# Supplementary material for: Iterated Virtual Screening-Assisted Antiviral and Enzyme Inhibition Assays Reveal the Discovery of Novel Promising Anti-SARS-CoV-2 with Dual Activity
Source: MDPI journal article supplement (doi:10.3390/ijms22169057), 2021-08-22
Supplement: s1 [file s1]

## Supplementary Data

**Supplementary Table 1. Molecular modeling of the 20 selected compounds within the binding active site of SARS-CoV-2 M<sup>pro</sup>.**

| Compound                                                                            | Moiety                                             | Interaction                                                 | Amino acid residue                                                             |
|-------------------------------------------------------------------------------------|----------------------------------------------------|-------------------------------------------------------------|--------------------------------------------------------------------------------|
| 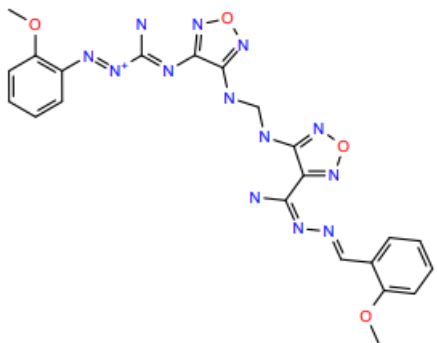   | NH2                                                | 2H-bonds<br>Hydrophobic bond                                | Glu-166 and Phe-140<br>Cys-44, Hie-41, Met-49,<br>Gln-189 and Pro-168          |
|   | NH<br>N of oxadiazole<br>Phenyl ring               | H-bond<br>H-bond<br>pi-pi stacking bond<br>Hydrophobic bond | Glu-166<br>Asn-142<br>Hie-41<br>Hie-41, Met-49, Cys-145, Met-165 and Pro-168   |
|  | NH2<br>NH<br>N<br>pyridyl moiety and CH            | 2H-bonds<br>H-bond<br>H-bond<br>Hydrophobic bond            | Cys-44 and Thr-25<br>Asn-142<br>Glu-166<br>Met-49, Cys-44, Glu-166 and Met-165 |
|  | NH2<br>NH<br>OH<br>Phenyl ring and oxadiazole ring | H-bond<br>H-bond<br>H-bond<br>Hydrophobic bond              | Phe-140<br>Cys-145<br>His-164<br>Hie-41                                        |
|  | NH2                                                | 2H-bonds<br>Hydrophobic bond                                | Phe-140 and Glu-166<br>Hie-41, Met-49, Cys-145, Met-165 and Gln-189            |

|                                                                                     |                                                                        |                                                                             |                                                                       |
|-------------------------------------------------------------------------------------|------------------------------------------------------------------------|-----------------------------------------------------------------------------|-----------------------------------------------------------------------|
| 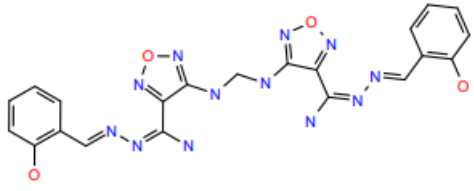   | Phenolic OH<br>NH2<br>NH2<br>N<br>Phenolic OH<br>Phenyl ring and<br>CH | H-bond<br>H-bond<br>H-bond<br>pi-pi stacking<br>bond<br>Hydrophobic<br>bond | Glu-166<br>Phe-140<br>Thr-26<br>His-40<br>Met-44, Cys-44 and Met-165. |
|    | 2NH<br>NH2                                                             | H-bonds<br>H-bond                                                           | Asn-142<br>Leu-141 and Glu-166                                        |
|   | NH2<br>Phenyl ring and<br>CH                                           | 2H-bonds<br>Hydrophobic<br>bond                                             | Phe-140 and Glu-166<br>His-41, Met-49, Cys-145, Met-165 and Gln-189   |
|  | NH2<br>Phenyl ring and<br>CH                                           | 2H-bonds<br>Hydrophobic<br>bond                                             | Glu-166<br>Cys-145.                                                   |
|  | NH2<br>Cl<br>Phenyl ring and<br>CH                                     | H-bond<br>Halogen bond<br>Hydrophobic<br>bond                               | His-164<br>Ser-144<br>Gln-189                                         |

|                                                                                     |                                                                |                                                      |                                         |
|-------------------------------------------------------------------------------------|----------------------------------------------------------------|------------------------------------------------------|-----------------------------------------|
| 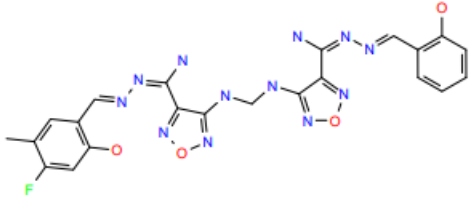   | Phenolic OH<br>NH<br>N of oxadiazoles<br>Phenyl ring and<br>CH | H-bond<br>H-bond<br>H-bond<br>Hydrophobic<br>bond    | His-164<br>Asn-142<br>Cys-145<br>Hie-41 |
|    | NH<br>oxadiazoles<br>Phenyl ring<br>Isopropyl ring             | H-bond<br>Hydrophobic<br>bond<br>Hydrophobic<br>bond | Asn-142<br>Hie-41<br>Met-49             |
|   | N<br>oxadiazole and<br>ring                                    | H-bond<br>2-Hydrophobic<br>bonds                     | Glu-166<br>Asn-142<br>Hie-41            |
|  | O of oxadiazole<br>NH2<br>Phenyl ring                          | H-bond<br>H-bond<br>2-Hydrophobic<br>bonds           | Gly-143<br>Leu-141<br>Hie-41            |

|                                                                                     |                                    |                                               |                                           |
|-------------------------------------------------------------------------------------|------------------------------------|-----------------------------------------------|-------------------------------------------|
| 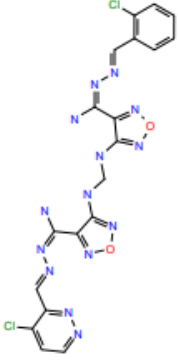   | NH2<br>Cl<br>Phenyl ring and<br>CH | H-bond<br>Halogen bond<br>Hydrophobic<br>bond | Glu-166<br>Cys-145 and Gly-143<br>Gln-189 |
|    | NH2<br>OH<br>Cl                    | H-bond<br>H-bond<br>Halogen bond              | Glu-166<br>Cys-145<br>Ala-191             |
|  | NH<br>NH2<br>Oxadiazole            | H-bonds<br>H-bond<br>Hydrophobic<br>bond      | Glu-166 and Gln-189<br>His-164<br>Hie-41  |
|  | NH2<br>NH2<br>Ring                 | H-bond<br>H-bond<br>Hydrophobic<br>bond       | His-164<br>Gln-189<br>Gln-192             |

|                                                                                   |                                       |                                                 |                                                     |
|-----------------------------------------------------------------------------------|---------------------------------------|-------------------------------------------------|-----------------------------------------------------|
| 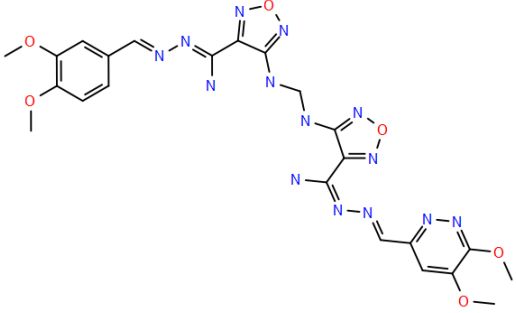 | NH2<br>Pyridazine ring<br>Phenyl ring | H-bond<br>H-bond<br>Hydrophobic bond            | Glu-166<br>Gly-143<br>Pro-168                       |
|  | NH<br>OH<br>NH2<br>Oxadiazole         | H-bonds<br>H-bond<br>H-bond<br>Hydrophobic bond | Asn-142<br>His-164 and Thr-190<br>Phe-140<br>Hie-41 |

**Supplementary Table 2. Molecular modeling of the 20 selected compounds within the binding active site of SARS-CoV-2 TMPRSS2.**

| Compound                                                                            | Moiety                                                     | Interaction                                                 | Amino acid residue                                                                                     |
|-------------------------------------------------------------------------------------|------------------------------------------------------------|-------------------------------------------------------------|--------------------------------------------------------------------------------------------------------|
| 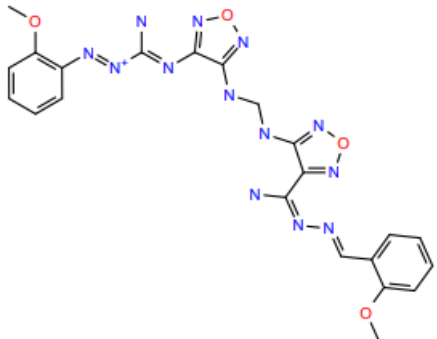   | OCH3<br>NH                                                 | H-bond<br>H-bond<br>Hydrophobic bond                        | Arg-41<br>Gln-192<br>Arg-41, Tyr-149, Ala-190, Val-213 and Cys-219                                     |
|    | NH<br>N                                                    | H-bond<br>H-bond<br>Hydrophobic bond                        | Gln-192<br>Ser-195<br>Arg-41, Cys-219 and Tyr-228                                                      |
|  | 2-NH<br>N of 4-pyridyl moiety<br>N pyridinyl moiety and CH | 2H-bonds<br>H-bond<br>H-bond<br>Hydrophobic bond            | Ser-214<br>Arg-41<br>Glu-218<br>His-57, Arg-41 and Cys-219 and Cys-42                                  |
|  | NH2<br>N of oxadiazole<br>Phenolic OH<br>OH                | H-bond<br>H-bond<br>H-bond<br>H-bond                        | His-57<br>Thr-26<br>Gly-148 and Gly-216<br>Gly-148                                                     |
|  | NH2<br>Cl<br>N                                             | 3- H-bonds<br>3- Halogen bond<br>H-bond<br>Hydrophobic bond | His-57, Ser-214, Gln-192<br>Ala-220, Ser-214, Ser-39<br>Arg-41<br>Arg-41, Val-213, Cys-219 and Tyr-228 |

|                                                                                     |                                                                                                |                                                          |                                                                                                  |
|-------------------------------------------------------------------------------------|------------------------------------------------------------------------------------------------|----------------------------------------------------------|--------------------------------------------------------------------------------------------------|
| 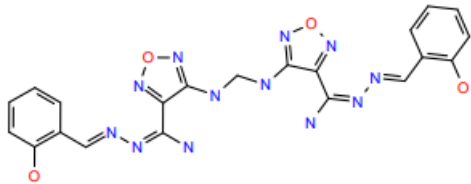   | Phenolic OH<br>NH <sub>2</sub><br>NH <sub>2</sub><br>N<br>Phenolic OH<br>Phenyl ring<br>and CH | H-bond<br>H-bond<br>H-bond<br>H-bond<br>Hydrophobic bond | Hie-40<br>Gln-192<br>Ser-214<br>Arg-41<br>Glu-218<br>Arg-41, Ala-190, Val-213, Cys-42 and Trp-36 |
|    | NH <sub>2</sub><br>N<br>Oxadiazole<br>ring                                                     | H-bond<br>H-bonds<br>Hydrophobic bond                    | Ser-195<br>Gln-192<br>His-57                                                                     |
|   | NH <sub>2</sub><br>NH                                                                          | H-bond<br>H-bond<br>Hydrophobic bond                     | Gln-192<br>Ser-214<br>Tyr-36, Arg-41, Gln-192,<br>Val-213 and Cys-219                            |
|  | NH <sub>2</sub><br>Phenyl ring                                                                 | H-bonds<br>Hydrophobic bond                              | Thr-62<br>His-57 and Ala-190                                                                     |
|  | NH <sub>2</sub><br>Phenyl ring                                                                 | H-bonds<br>Hydrophobic bond                              | Gly-216<br>Ala-190                                                                               |

|                                                                                     |                                        |                                                |                                                   |
|-------------------------------------------------------------------------------------|----------------------------------------|------------------------------------------------|---------------------------------------------------|
| 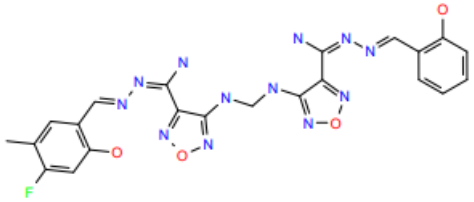   | Phenolic OH<br>NH2<br>N<br>Oxadiazole  | H-bond<br>H-bond<br>H-bond<br>Hydrophobic bond | Glu-218 and Gly-216<br>Pro-97<br>Hie-99<br>Hie-96 |
|    | NH<br>Oxadiazole<br>Phenyl ring        | H-bond<br>Hydrophobic bond<br>Hydrophobic bond | Ser-195<br>His-57<br>Gln-192                      |
|   | N<br>oxadiazole and<br>phenyl ring     | H-bond<br>2-Hydrophobic<br>bonds               | Gly-216<br>Tyr-149<br>Gln-192                     |
|  | N of<br>oxadiazole<br>N<br>Phenyl ring | H-bond<br>H-bond<br>Hydrophobic<br>bonds       | Gln-192<br>Hie-99<br>Hie-99                       |



|                                                                                     |                               |                                                      |                                                 |
|-------------------------------------------------------------------------------------|-------------------------------|------------------------------------------------------|-------------------------------------------------|
| 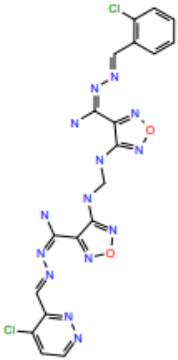   | NH2<br>Cl<br>NH<br>Oxadiazole | H-bond<br>Halogen bond<br>H-bond<br>Hydrophobic bond | Thr-62 and Cys-58<br>Arg-41<br>His-57<br>Hie-96 |
|    | NH2<br>N<br>Pyridine          | H-bond<br>H-bond<br>Hydrophobic bond                 | Glu-218 and Asp-147<br>Gly-218<br>Hie-99        |
|  | NH<br>NH2<br>N                | H-bonds<br>H-bond<br>H-bond                          | His-57<br>Arg-41<br>Gln-192                     |
|  | N<br>Cl<br>N of pyrazine      | H-bond<br>Halogen bond<br>H-bond                     | Gly-193 and Hie-99<br>Glu-218<br>Gln-192        |

|                                                                                   |                                          |                                                 |                                                   |
|-----------------------------------------------------------------------------------|------------------------------------------|-------------------------------------------------|---------------------------------------------------|
| 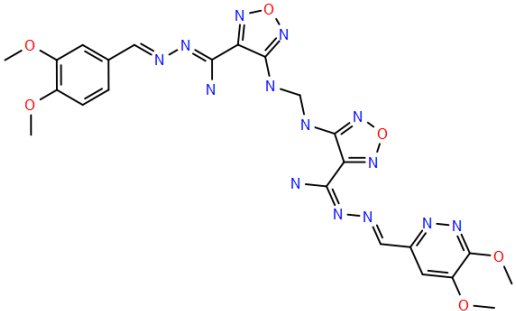 | NH <sub>2</sub><br>NH                    | H-bond<br>H-bond                                | Gln-192<br>Gly-218                                |
|  | N<br>OH<br>NH <sub>2</sub><br>Oxadiazole | H-bond<br>2H-bond<br>H-bond<br>Hydrophobic bond | Hie-99<br>Gly-216 and Glu-218<br>Pro-97<br>Hie-96 |

**Supplementary Table 3. WaterMap analysis of M<sup>pro</sup> and TMPRSS2.**

| Site | Free energy<br>(dG) of<br>TMPRSS2 | Free energy<br>(dG) of M <sup>pro</sup> | Site | Free energy<br>(dG) of<br>TMPRSS2 | Free energy<br>(dG) of M <sup>pro</sup> |
|------|-----------------------------------|-----------------------------------------|------|-----------------------------------|-----------------------------------------|
| 1    | 2.92                              | 6.94                                    | 55   | 1.31                              | 2.45                                    |
| 2    | 8.1                               | 2.73                                    | 56   | -0.44                             | -0.89                                   |
| 3    | 7.39                              | 6.51                                    | 57   | 2.12                              | 3.17                                    |
| 4    | 3.49                              | 7.4                                     | 58   | 0.9                               | 1.88                                    |
| 5    | 4.23                              | 2.27                                    | 59   | 1.04                              | 2.08                                    |
| 6    | 6.66                              | 1.89                                    | 60   | 1.58                              | 6.28                                    |
| 7    | 6.21                              | 2.39                                    | 61   | 1.54                              | 1.46                                    |
| 8    | 5.05                              | 3.34                                    | 62   | 1.49                              | 2.81                                    |
| 9    | 4.71                              | 2.2                                     | 63   | 0.49                              | 2.19                                    |
| 10   | 2.43                              | 7.52                                    | 64   | 2                                 | 3.16                                    |
| 11   | 6.01                              | 1.77                                    | 65   | 2.22                              | 1.88                                    |
| 12   | 3.35                              | 1.79                                    | 66   | 1.86                              | -0.5                                    |
| 13   | 3.82                              | 1.3                                     | 67   | 3.83                              | 2.56                                    |
| 14   | 4.45                              | 2.41                                    | 68   | 2.26                              | 1.21                                    |
| 15   | 3.5                               | 1.6                                     | 69   | 3.57                              | 0.98                                    |
| 16   | 2.91                              | 2.55                                    | 70   | 0.71                              | 2.03                                    |
| 17   | 2.44                              | 2.22                                    | 71   | 1.54                              | 1.41                                    |
| 18   | 3.25                              | 3.19                                    | 72   | 1.57                              | 1.51                                    |
| 19   | 3.21                              | 0.92                                    | 73   | -1.72                             | 2.05                                    |
| 20   | 1.12                              | -0.02                                   | 74   | 1.84                              | 1.3                                     |
| 21   | 2.91                              | 1.42                                    | 75   | 1.66                              | 1.04                                    |
| 22   | 1.04                              | 4.02                                    | 76   | 2.77                              | 1.01                                    |
| 23   | 2.88                              | 2.87                                    | 77   | 0.61                              | 1.49                                    |
| 24   | 1.4                               | 4.15                                    | 78   | 1.9                               | 1.17                                    |
| 25   | -0.27                             | -0.28                                   | 79   | 1.02                              | 1.67                                    |
| 26   | 3.13                              | 1.82                                    | 80   | 1.45                              | 1.58                                    |
| 27   | 4.21                              | 1.24                                    | 81   | 0.69                              | 1.28                                    |
| 28   | 1.39                              | 3.76                                    | 82   | -0.17                             | 1.73                                    |
| 29   | 6.58                              | 2.25                                    | 83   | 0.89                              | 2.48                                    |
| 30   | 1.14                              | 3.89                                    | 84   | 1.7                               | 1.02                                    |
| 31   | 1.75                              | 3.8                                     | 85   | 2.64                              | 0.79                                    |
| 32   | 2.38                              | 2.34                                    | 86   | 0.72                              | 0.09                                    |
| 33   | -1.38                             | 2.36                                    | 87   | 2.74                              | 0.79                                    |
| 34   | 1.36                              | 4.06                                    | 88   | 1.23                              | 2.45                                    |
| 35   | 2.74                              | 1.87                                    | 89   | 0.65                              | 1.06                                    |
| 36   | 0.87                              | 1.94                                    | 90   | 2.08                              | 1.35                                    |
| 37   | 0.85                              | 3.18                                    | 91   | 1.66                              | 0.6                                     |
| 38   | 1.53                              | 2.23                                    | 92   | -0.79                             | 2.02                                    |
| 39   | 5.3                               | 1.73                                    | 93   | 1.77                              | 1.85                                    |
| 40   | 1.96                              | 2.42                                    | 94   | 0.42                              | 1.34                                    |
| 41   | -0.4                              | 0.72                                    | 95   | 0.57                              | 1.16                                    |
| 42   | 1.42                              | 3.65                                    | 96   | 1.52                              | 0.82                                    |
| 43   | 0.12                              | 1.19                                    | 97   | 2.24                              | 1.35                                    |
| 44   | 1.68                              | 2.93                                    | 98   | 2.22                              | 1.57                                    |
| 45   | -0.76                             | 2.41                                    | 99   | 2.03                              | 2.27                                    |
| 46   | 2.15                              | 2.3                                     | 100  | 3.17                              | 1.44                                    |
| 47   | 2.75                              | 3.15                                    | 101  | 1.84                              | 1.3                                     |
| 48   | 2.53                              | 2.34                                    | 102  | 0.55                              | 2.49                                    |
| 49   | 1.06                              | 0.15                                    | 103  | -1.15                             | 0.79                                    |
| 50   | 1.47                              | 1.41                                    | 104  | 1.9                               | 1.48                                    |
| 51   | 1.44                              | 1.19                                    | 105  | 2.42                              | 0.78                                    |
| 52   | -0.29                             | 3.43                                    | 106  |                                   | 0.92                                    |
| 53   | 3.89                              | 4.4                                     | 107  |                                   | 2.19                                    |
| 54   | 2.6                               | 1.88                                    | 108  |                                   | 1.2                                     |
|      |                                   |                                         | 109  |                                   | 1.57                                    |
|      |                                   |                                         | 110  |                                   | 1.2                                     |
|      |                                   |                                         | 111  |                                   | 1.52                                    |

## Supplementary Figures

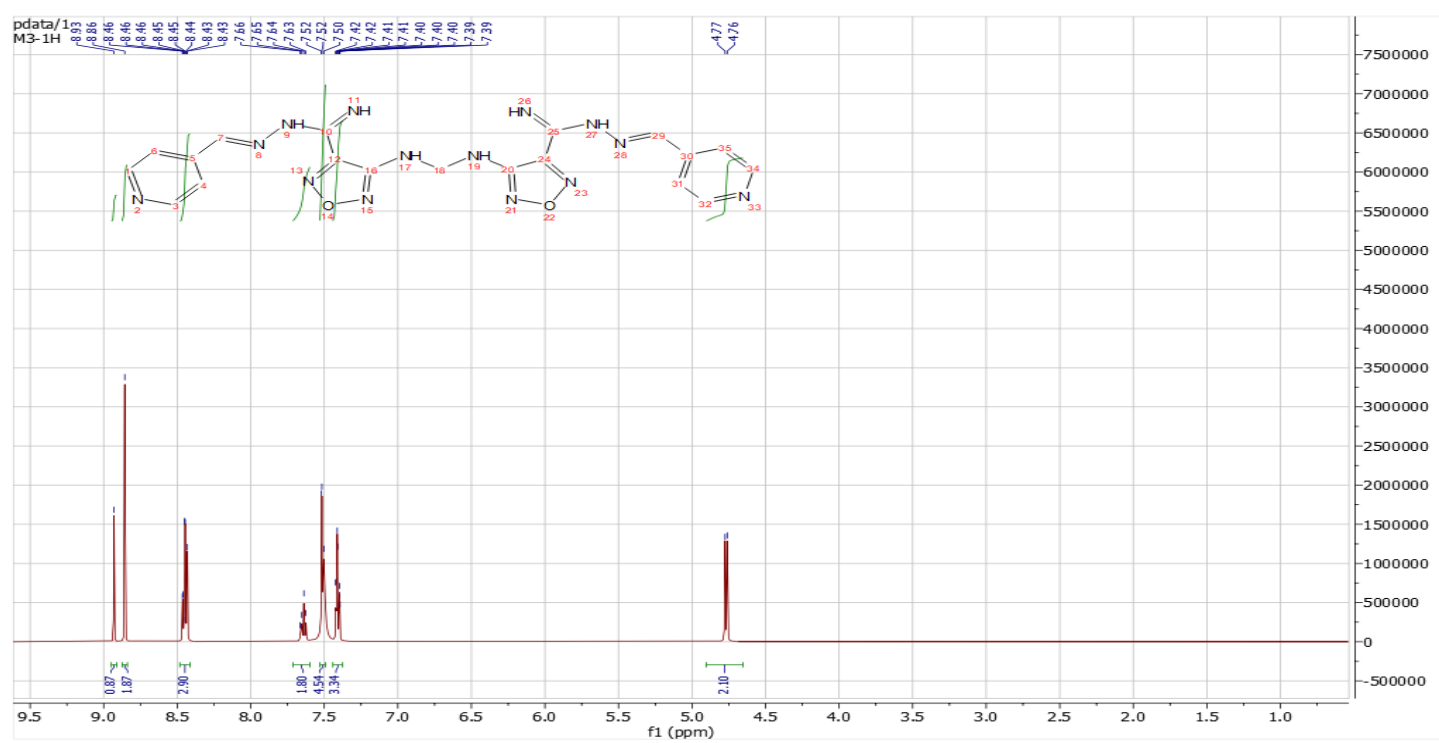

Supplementary Figure 1. NMR data of compound M3.

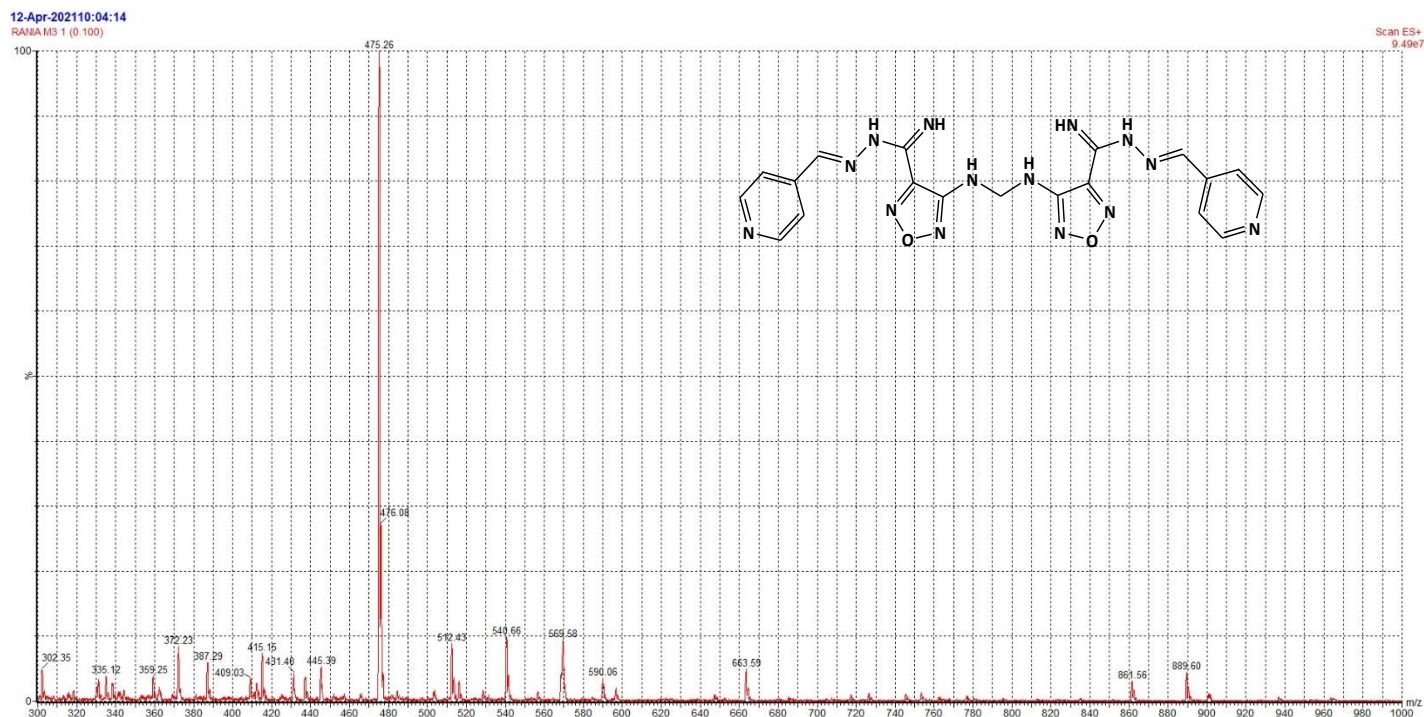

**Supplementary Figure 2. Mass spectrometry of compound M3.**

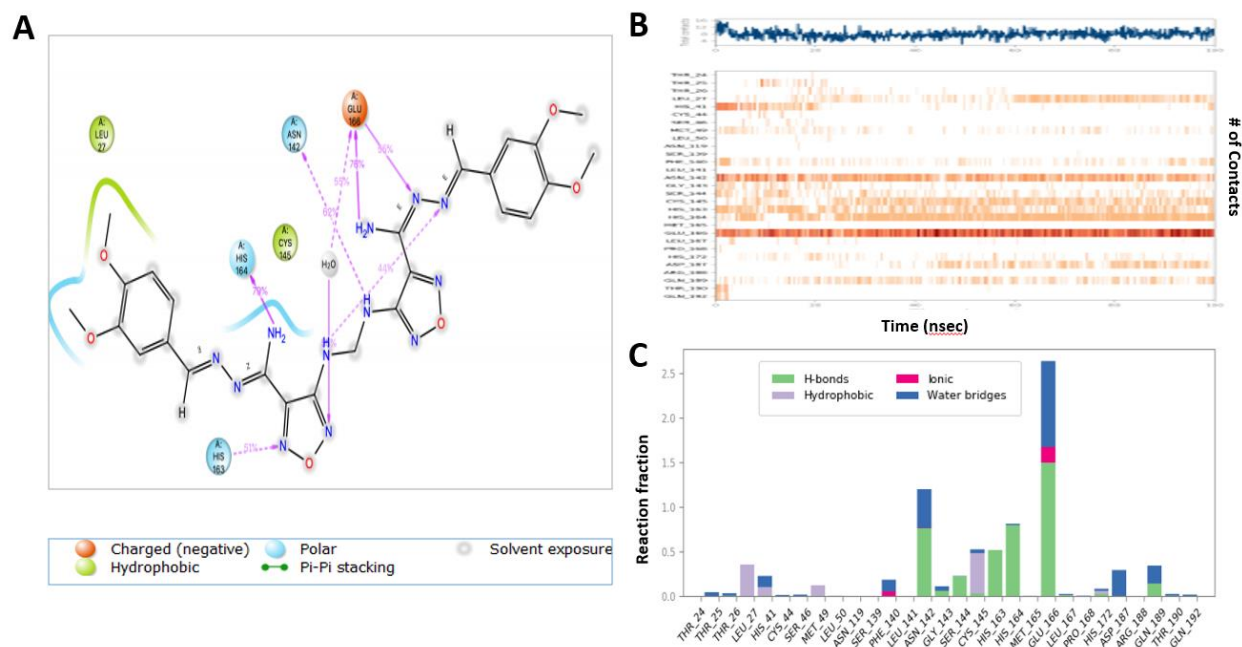

**Supplementary Figure 3. Interaction diagram of M1 with M<sup>pro</sup> protein observed during the molecular dynamic simulation. (A) Protein-ligand interaction diagram. (B) The top panel showed the specific contact of M<sup>pro</sup> protein with M1 in each trajectory course, the bottom panel showed the amino acid residues that interact with the ligand in the trajectory time frame. The residues making more than one contact were shown in darker color shade. (C) Schematic diagram of ligand interaction with the amino acid residues of protein during MD simulation.**

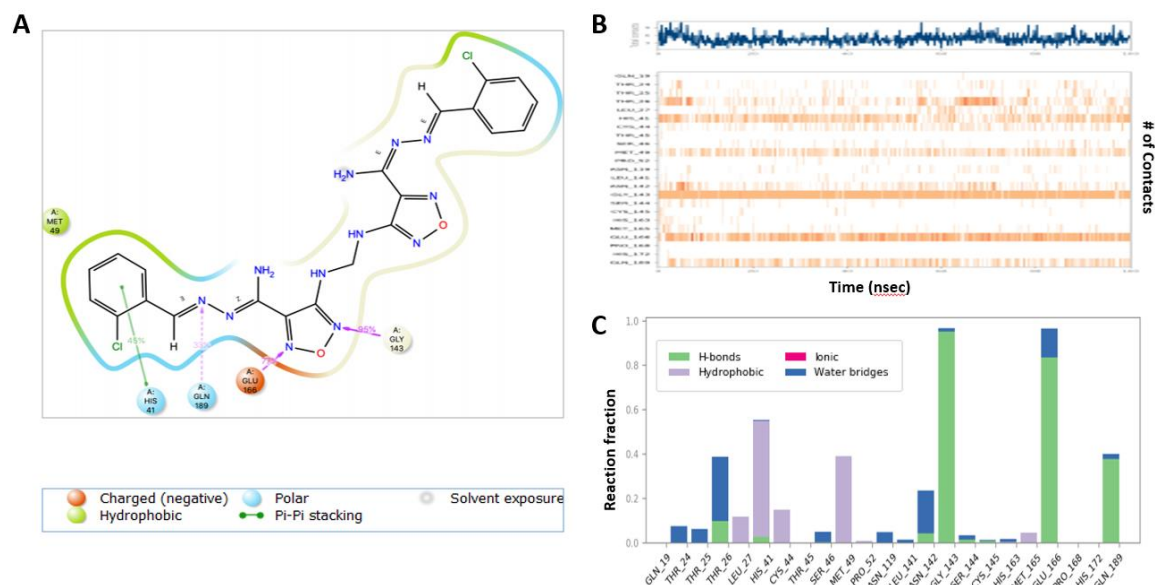

**Supplementary Figure 4. Interaction diagram of M2 with M<sup>pro</sup> protein observed during the molecular dynamic simulation. (A) Protein-ligand interaction diagram. (B) The top panel showed the specific contact of M<sup>pro</sup> protein with M2 in each trajectory course, the bottom panel showed the amino acid residues that interact with the ligand in the trajectory time frame. The residues making more than one contact were shown in darker color shade. (C) Schematic diagram of ligand interaction with the amino acid residues of protein during MD simulation.**

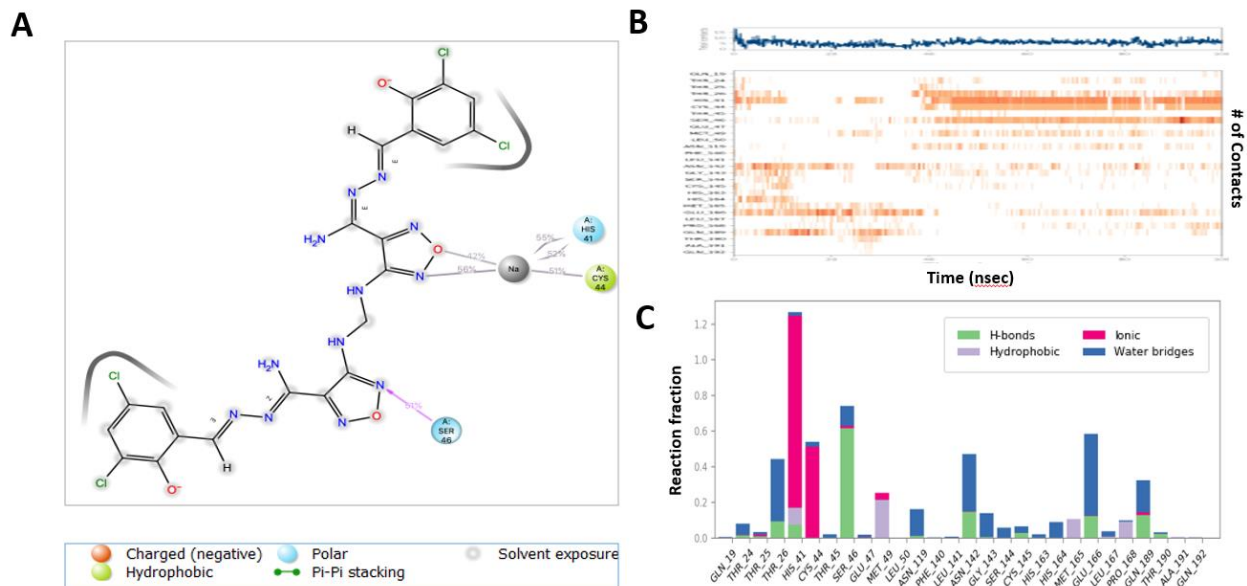

**Supplementary Figure 5. Interaction diagram of M4 with M<sup>pro</sup> protein observed during the molecular dynamic simulation. (A) Protein-ligand interaction diagram. (B) The top panel showed the specific contact of M<sup>pro</sup> protein with M4 in each trajectory course, the bottom panel showed the amino acid residues that interact with the ligand in the trajectory time frame. The residues making more than one contact were shown in darker color shade. (C) Schematic diagram of ligand interaction with the amino acid residues of protein during MD simulation.**



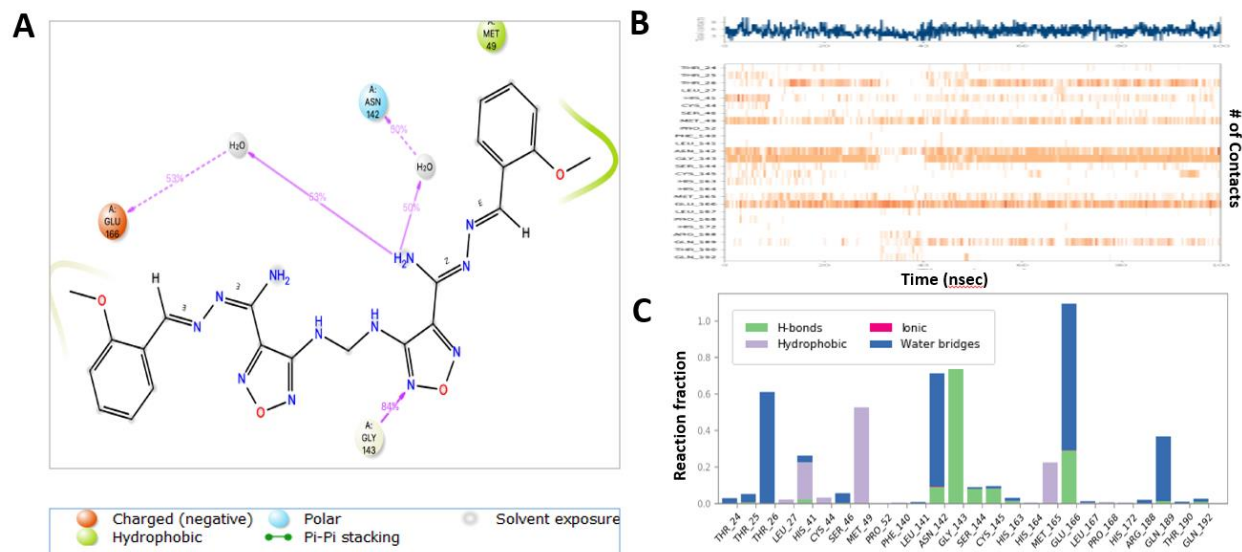

**Supplementary Figure 6. Interaction diagram of M5 with M<sup>pro</sup> protein observed during the molecular dynamic simulation. (A) Protein-ligand interaction diagram. (B) The top panel showed the specific contact of M<sup>pro</sup> protein with M5 in each trajectory course, the bottom panel showed the amino acid residues that interact with the ligand in the trajectory time frame. The residues making more than one contact were shown in darker color shade. (C) Schematic diagram of ligand interaction with the amino acid residues of protein during MD simulation.**

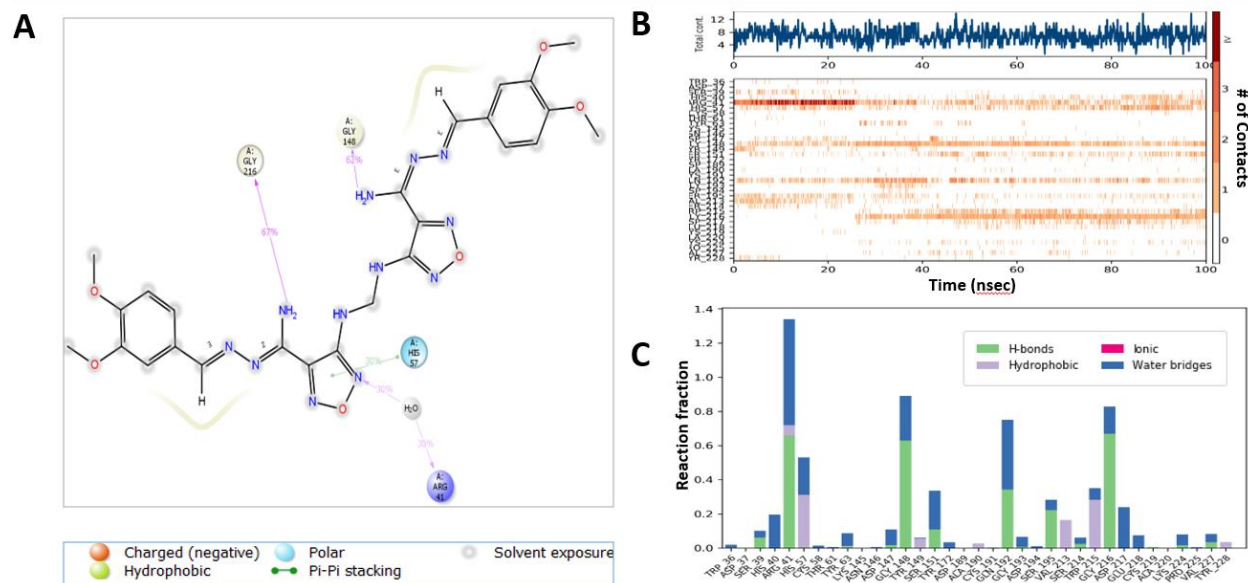

**Supplementary Figure 7. Interaction diagram of M1 with TMPRSS2 protein observed during the molecular dynamic simulation. (A) Protein-ligand interaction diagram. (B) The top panel showed the specific contact of TMPRSS2 protein with **M1** in each trajectory course, the bottom panel showed the amino acid residues that interact with the ligand in the trajectory time frame. The residues making more than one contact were shown in darker color shade. (C) Schematic diagram of ligand interaction with the amino acid residues of protein during MD simulation.**
